# Supplementary material
Source: PubMed Central journal article supplement (PMC5082185)
Supplement: NIHMS813368-supplement-3.pdf [file NIHMS813368-supplement-3.pdf]

# Supplementary Information

## PTBP1 and PTBP2 repress nonconserved cryptic exons

Jonathan P. Ling, Resham Chhabra, Jonathan D. Merran, Paul M. Schaughency,

Sarah J. Wheelan, Jeffrey L. Corden, Philip C. Wong

Correspondence to P.C.W. (wong@jhmi.edu)

### Supplementary Data

- Supplemental Experimental Procedures
- Supplemental Figures 1 to 8
- Supplemental Tables 1 and 2

## Supplemental Experimental Procedures

RT-PCR primers used for Fig. 2 are listed below:

FERMT2 (108/141 bp)

Forward: AGGGGCCTCTTATCACTCCT

Reverse: GTGACAAGGGGCTTCCATCA

ANKS6 (168/289 bp)

Forward: CTTCGAGGTTGCACTGGACT

Reverse: CTGGGGTCTTCATCGGCAAT

PHLDB2 (150/171 bp)

Forward: CATCACCCCAAAGGCCCATC

Reverse: TGCCTGTGTCCTTCACTCAT

PBRM1 (175/295 bp)

Forward: ACTCTCCATTCCAGCTCTGTG

Reverse: CCATCATCAAAGTCCCCGCT

qRT-PCR primers used for Supplemental Fig. 1 are listed below:

ANKS6 (166 bp)

Forward: TCTGAACTGAACGCAGGCAA

Reverse: GGATTCAGAGAGCTCACGCT

IQGAP1 (178 bp)

Forward: TGCTGAAGGACTCGTTGCAT

Reverse: AGATTTTCGGCGTTGGTCTGT

LEPRE1 (71 bp)

Forward: CACAGCGAGCGGGACAG

Reverse: AGGTCCATCTCTTCTGGGCT

LEPREL2 (156 bp)

Forward: TATCGGGACTACAGCGGACT

Reverse: CCCATGGGGATTCTCGACAC

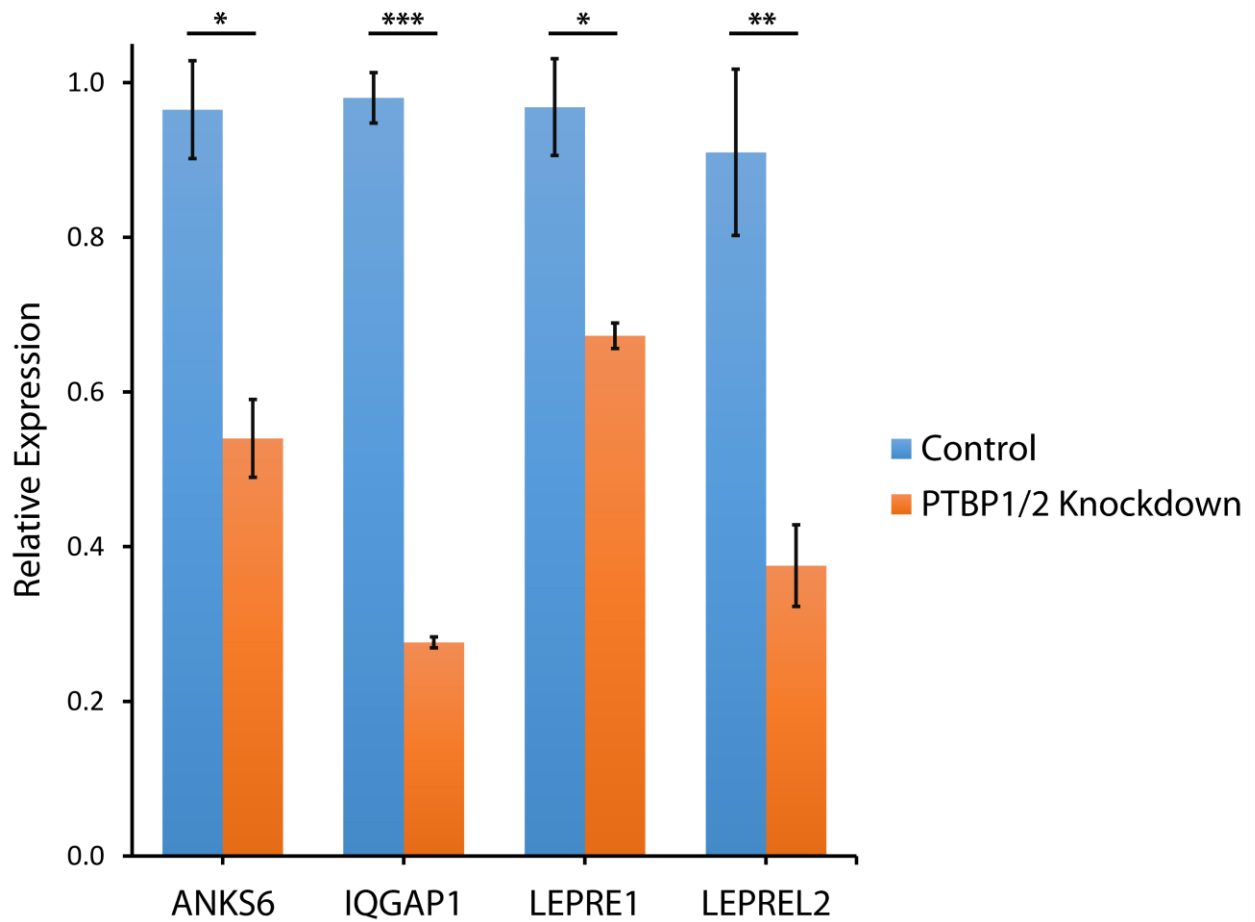

**Supplemental Figure 1, related to Figure 2 | PTBP1/2 conserved and nonconserved repressed exons that induce nonsense-mediated decay lead to the downregulation of associated transcripts**

qRT-PCR confirmation that PTBP1/2 repressed exons predicted to induce NMD result in downregulation of mRNA transcripts. Data are represented as mean  $\pm$ SEM, n=3. \*p<0.05; \*\*p<0.005; \*\*\*p<0.001.

**A**

Gene: FERMT2

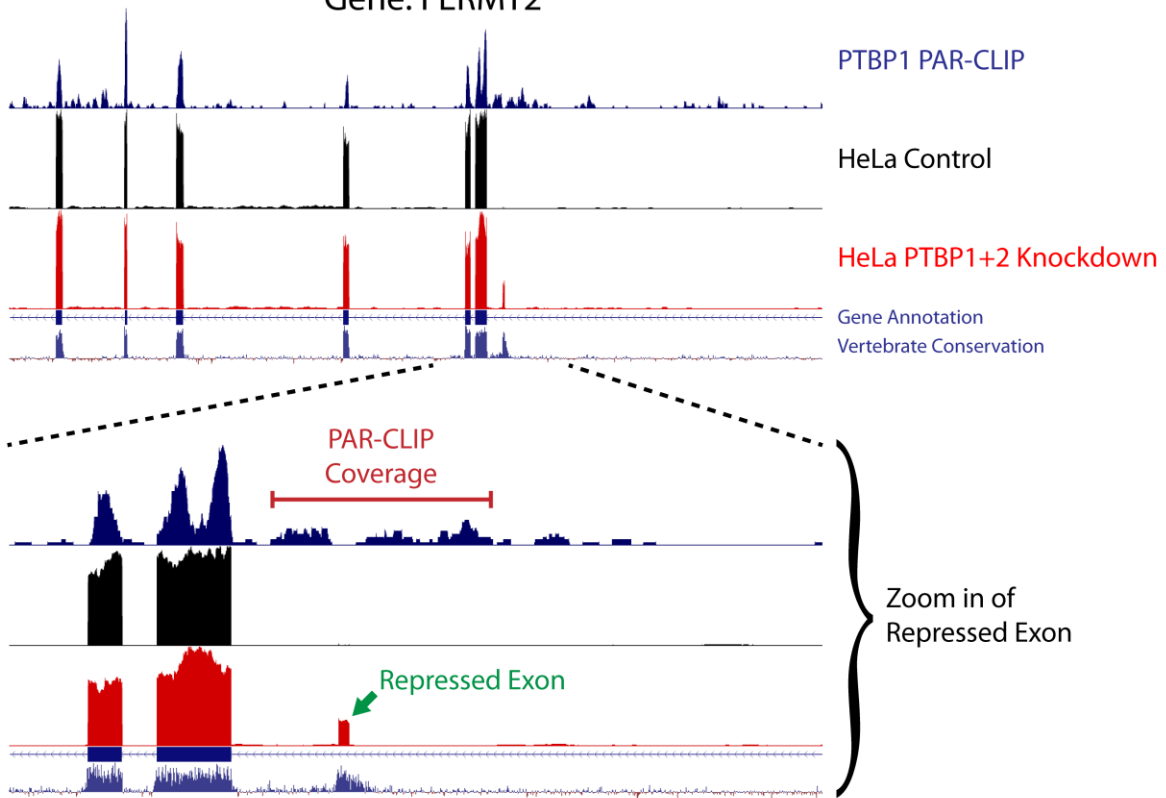**B**

C5orf42

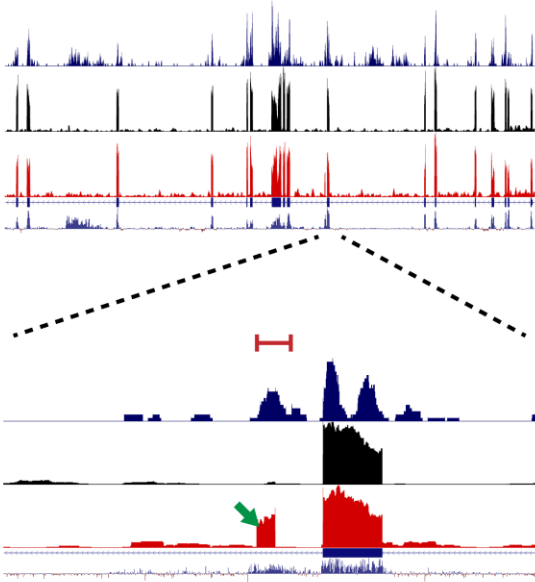**C**

SPTAN1

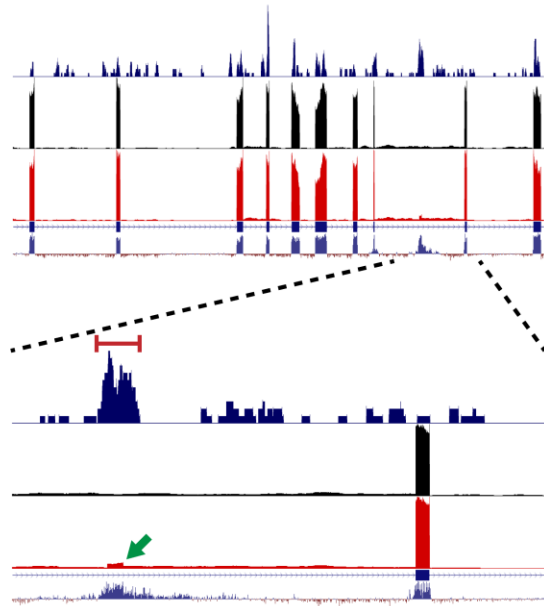

D

FLNA

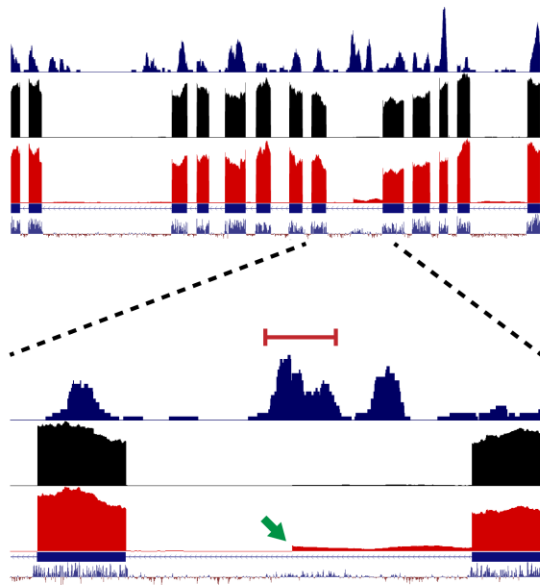

E

MYCBP2

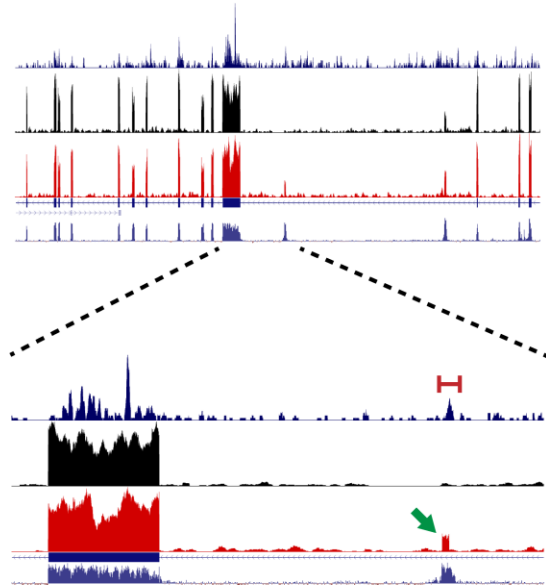

F

PHLDB2

hg19 || chr3:111,677,122-111,677,142

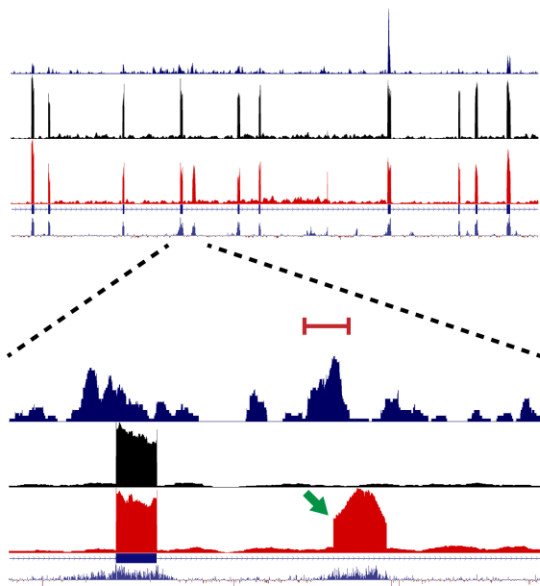

G

PHLDB2

hg19 || chr3:111,668,549-111,668,737

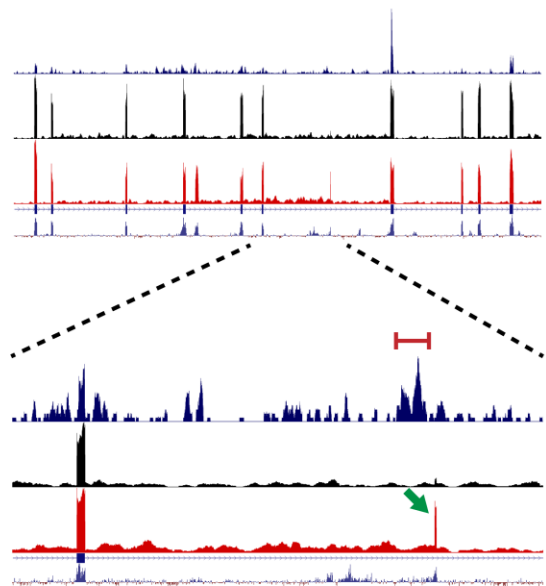

H

IQGAP1

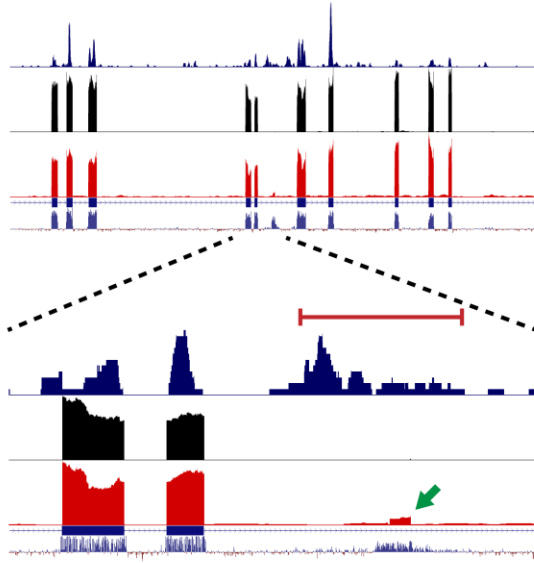

I

DST

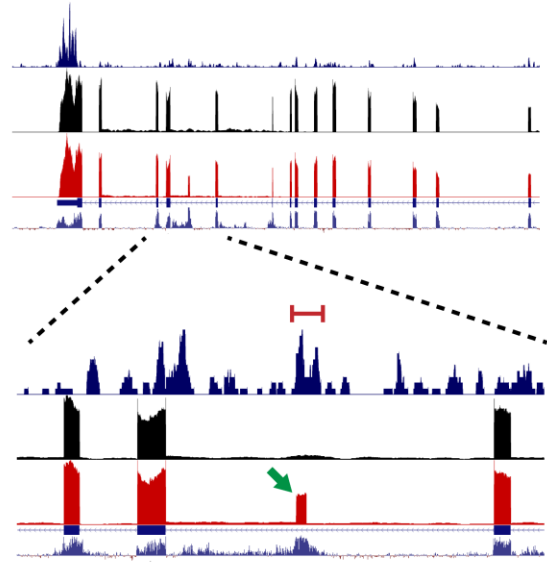

J

ACTN4

hg19 || chr19:39,201,916-39,202,001

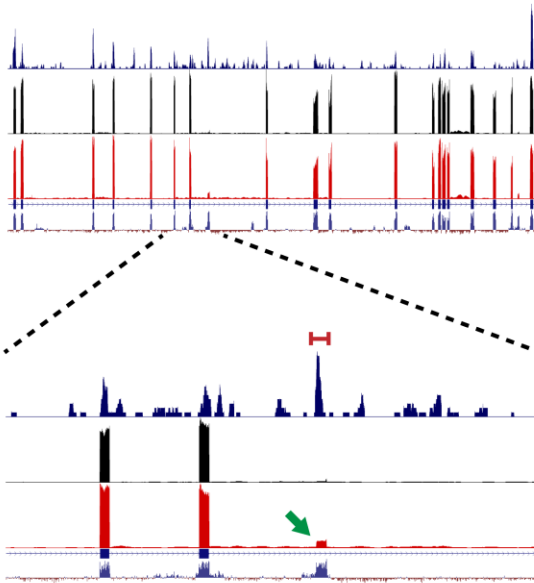

K

ACTN4

hg19 || chr19:39,218,956-39,219,021

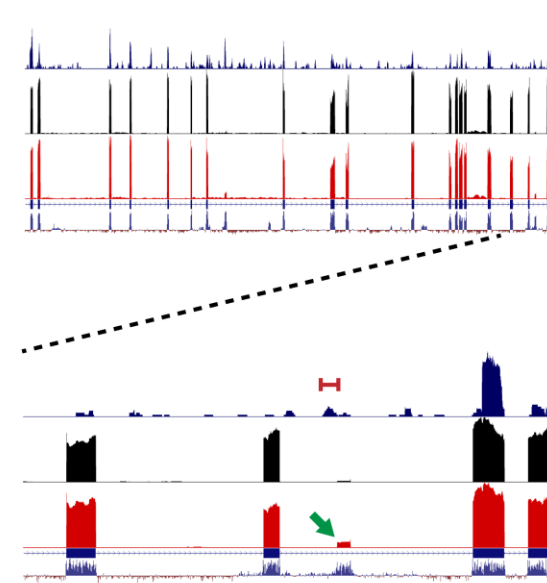

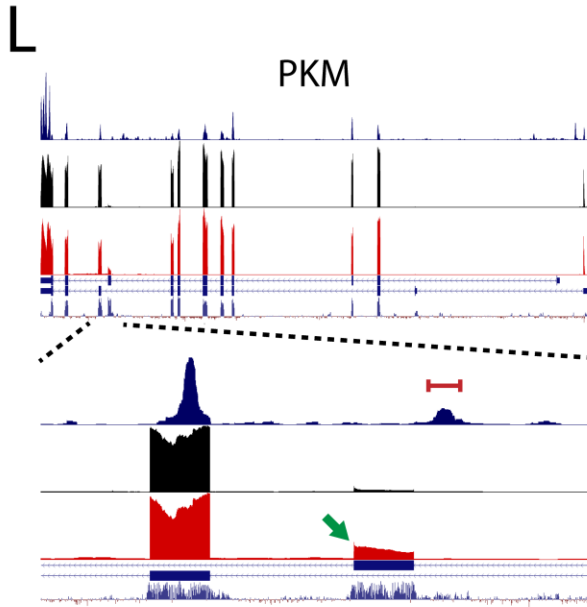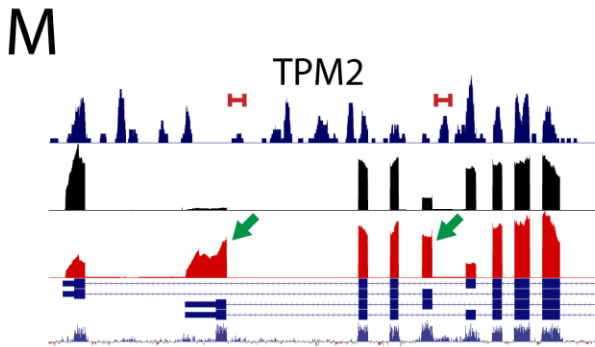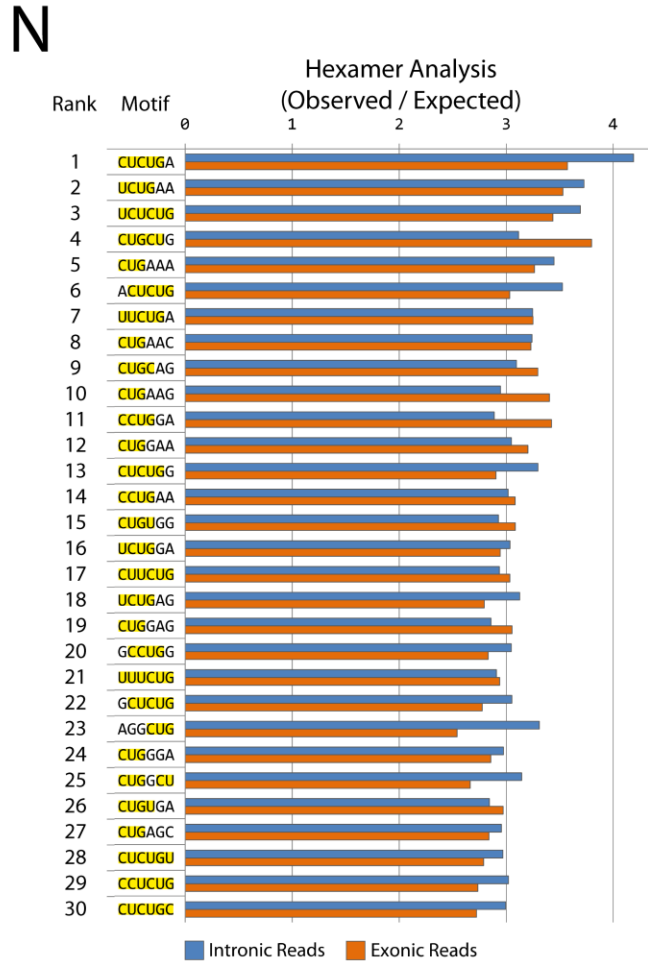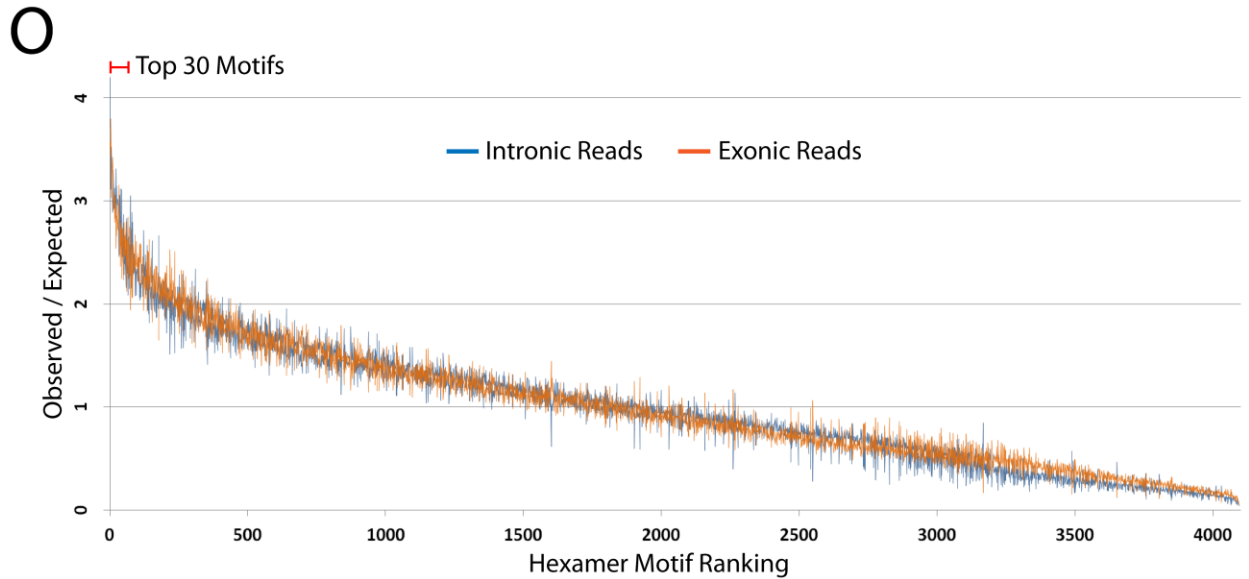

### **Supplemental Figure 2, related to Figure 2 | PTBP1 PAR-CLIP analysis.**

(A) Reads from PAR-CLIP were mapped to the human hg19 reference genome to visualize the direct RNA targets PTBP1 (top row, blue). Cross referencing with RNA-seq data from HeLa control (black) and HeLa double knockdown of PTBP1 and PTBP2 (red) revealed PAR-CLIP peaks (red bar) associated with the repressed exon of FERMT2 (green arrow). (B–K) Similar PAR-CLIP peaks can be found across other repressed exons, although many reads are also associated with exonic sequences. PTBP1 has been documented to have many other functions in mRNA processing<sup>10-13</sup> in addition to the role of splicing repression. Given the low complexity consensus sequence of PTBP1, it is hypothesized that PTBP1 binds ubiquitously to CU-rich elements and that its function is dictated more by the local genomic sequence and splicing factor environment than by PTBP1's RNA-binding domains. (L and M) Peaks can be observed at CU microsatellites directly upstream PKM exon 9a (L) and TPM2 exon 6a (M), both found to interact with PTBP1 from previous CLIP experiments performed in HeLa cells (Xue et al., 2009). (N) The top 30 hexamers present in intronic and exonic reads as compared to shuffled control. As expected pyrimidine rich motifs are over represented. Interestingly, many motifs also contain a trinucleotide CUG sequence. (O) All hexamer motifs ranked by the observed/expected ratio.



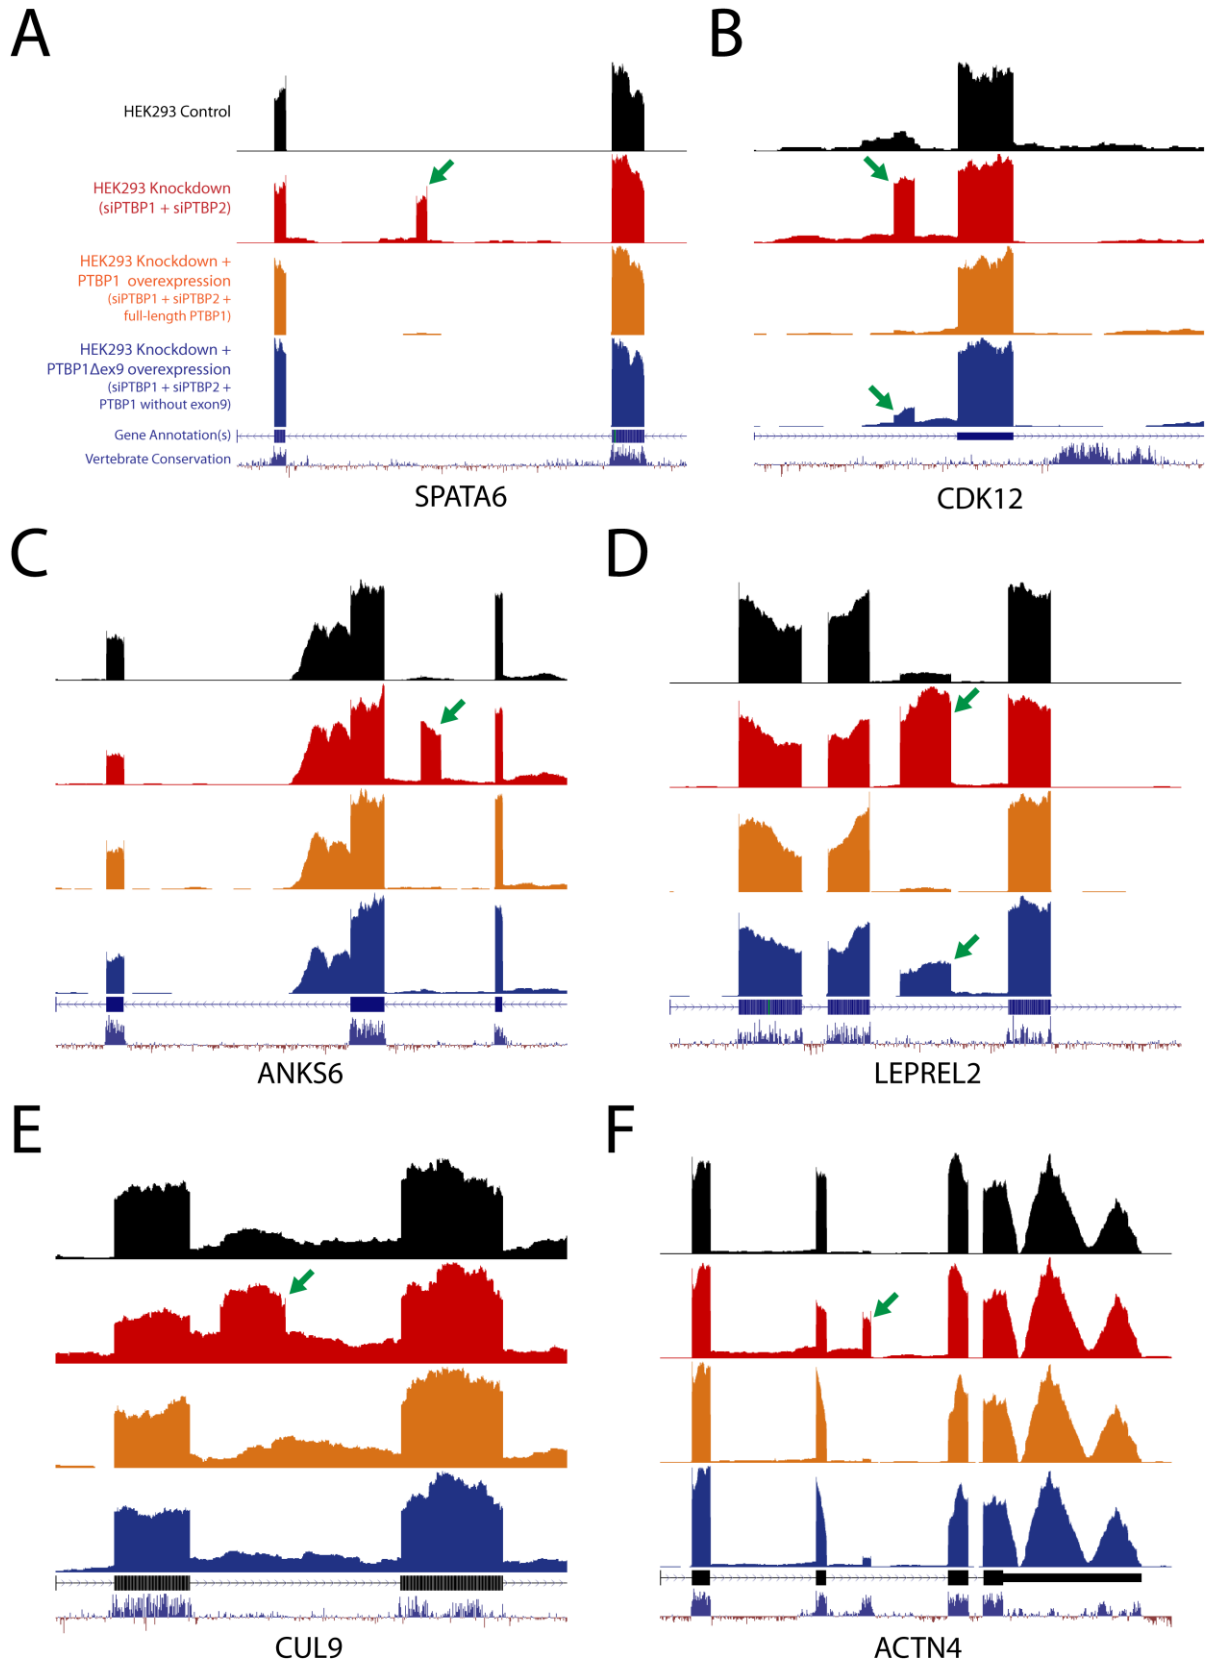

**G**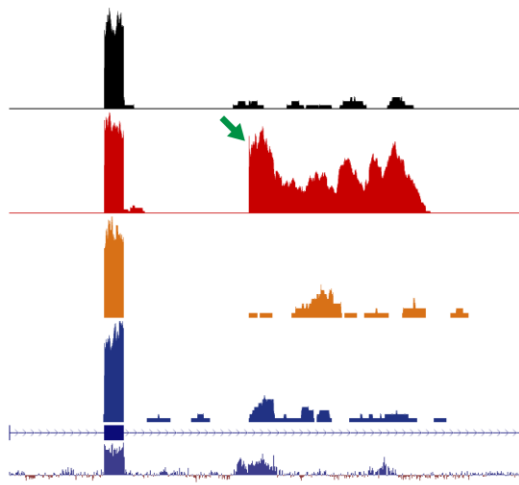

RUNX2

**H**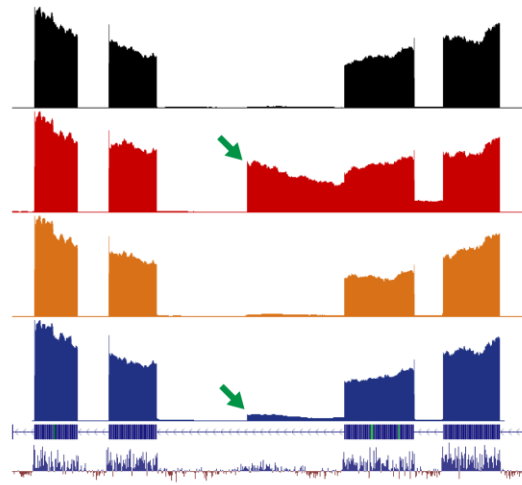

FLNA

**I**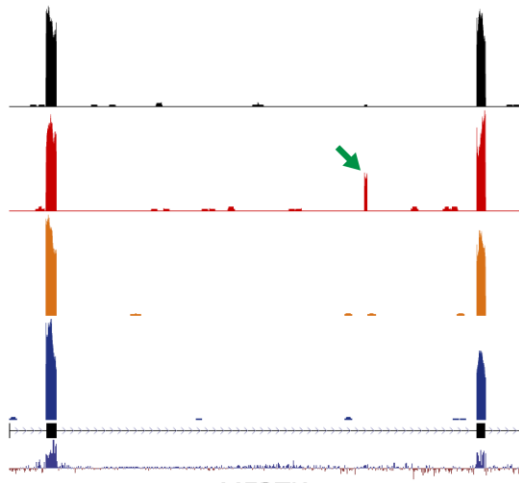

MERTK

**J**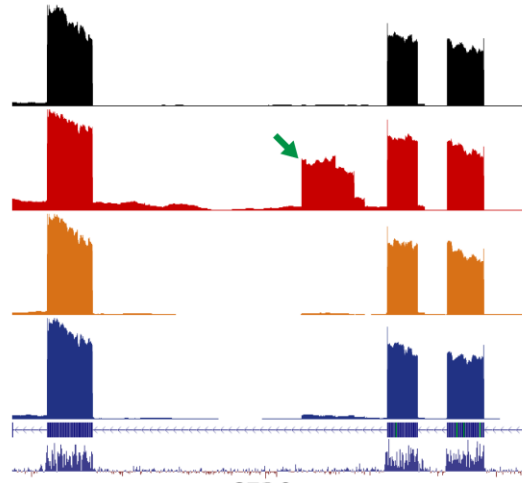

CERS5

**K**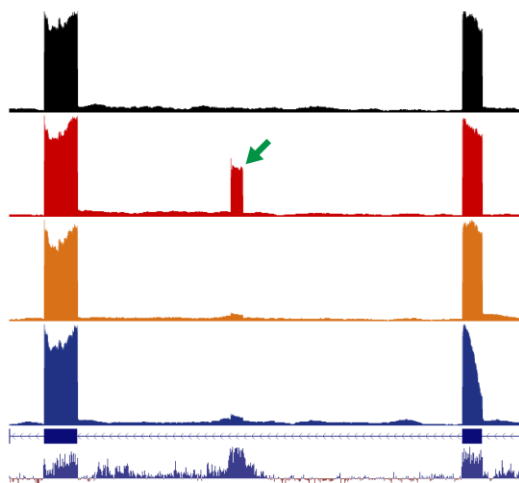

DST

**L**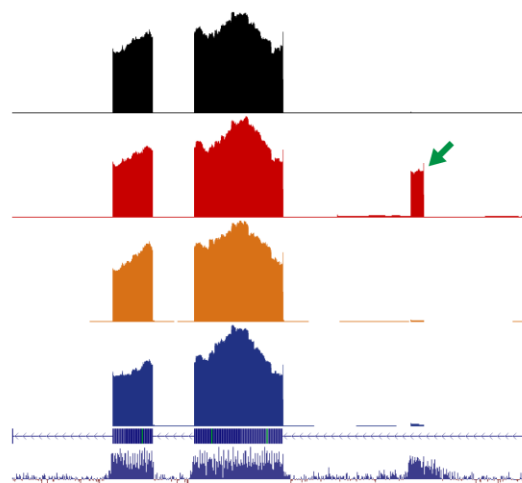

FERMT2

**Supplemental Figure 3, related to Figure 2 | Full-length PTBP1 and PTBP1 $\Delta$ ex9 are capable of restoring exon repression.**

(A) RNA-seq coverage from HEK293 control (black), HEK293 double knockdown of PTBP1 and PTBP2 (red), HEK293 double knockdown with concurrent transfection of full-length PTBP1 (orange), and HEK293 double knockdown with concurrent transfection of PTBP1 without exon 9 (PTBP1 $\Delta$ ex9, blue). Exon 9 of PTBP1 has been previously shown to alter the alternative splicing activity of PTBP1 (Gueroussov et al., 2015). Reintroducing full-length PTBP1 or PTBP1 $\Delta$ ex9 in the double knockdown setting restores the repression of PTBP1/2 exons (green arrows). (B–L) Similar repression can be seen for many other cryptic exons. Interestingly, while the majority of exons are repressed by PTBP1 $\Delta$ ex9, certain cryptic exons appear to be more resistant to PTBP1 $\Delta$ ex9 overexpression (e.g. B, D, F, H).

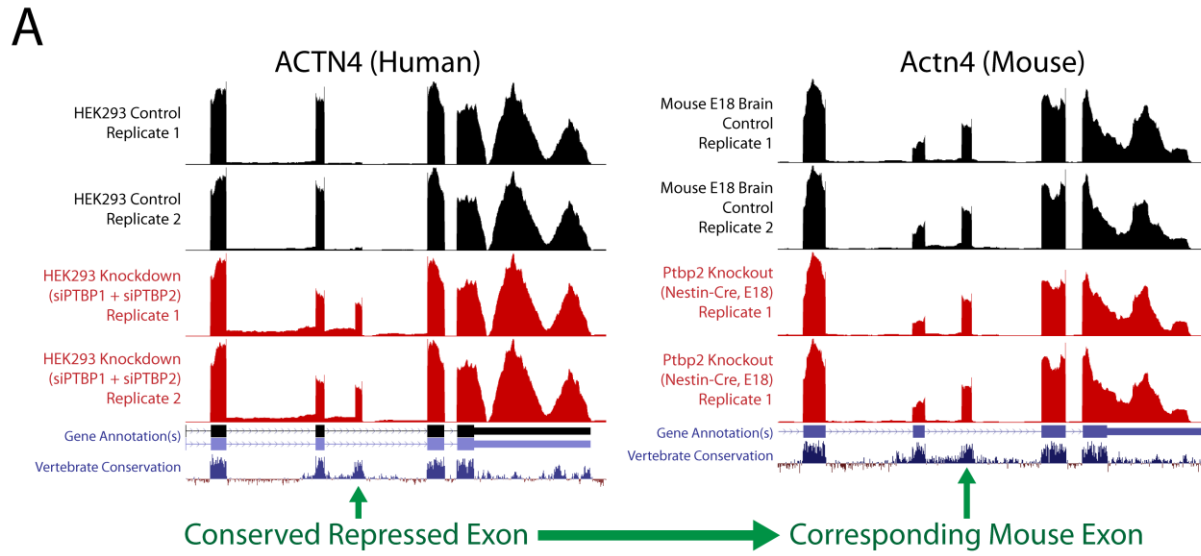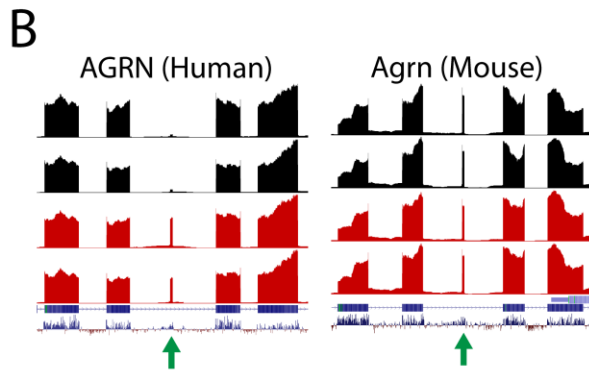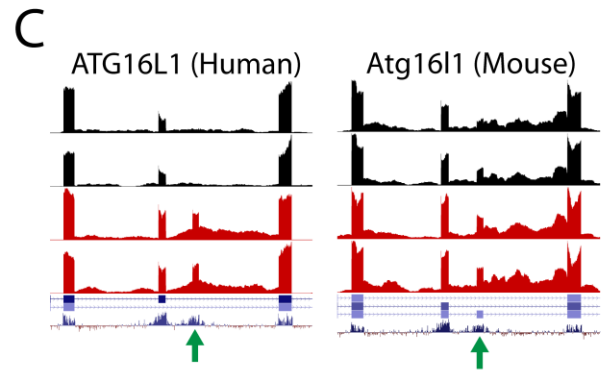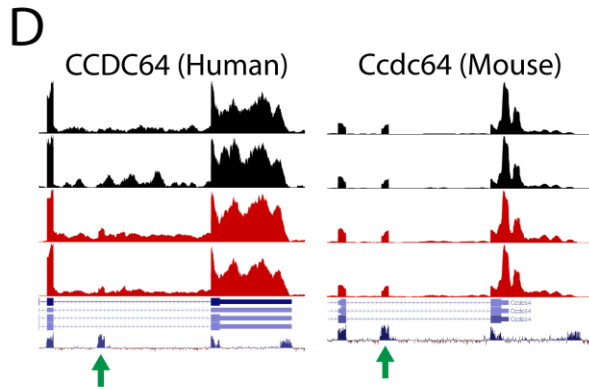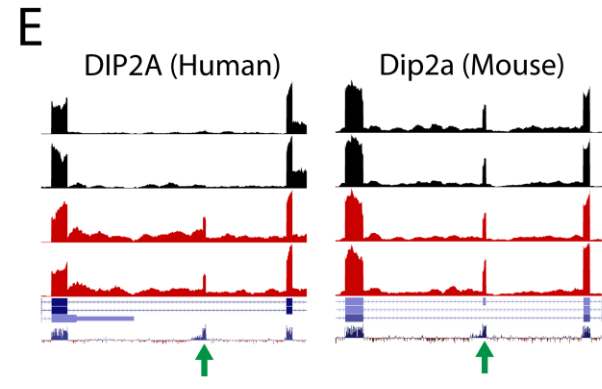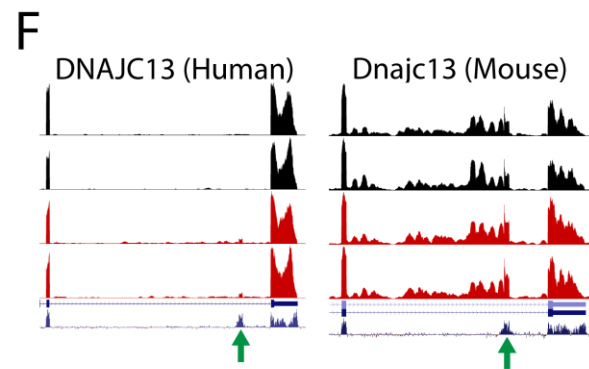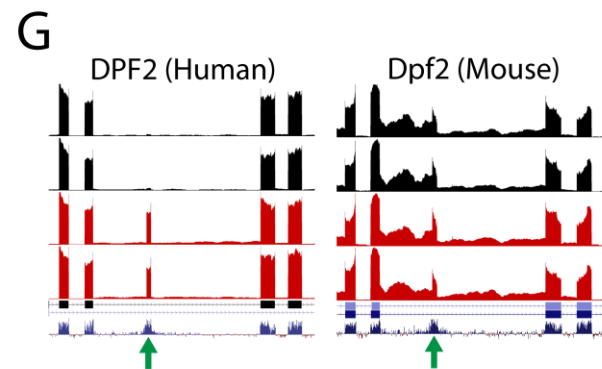

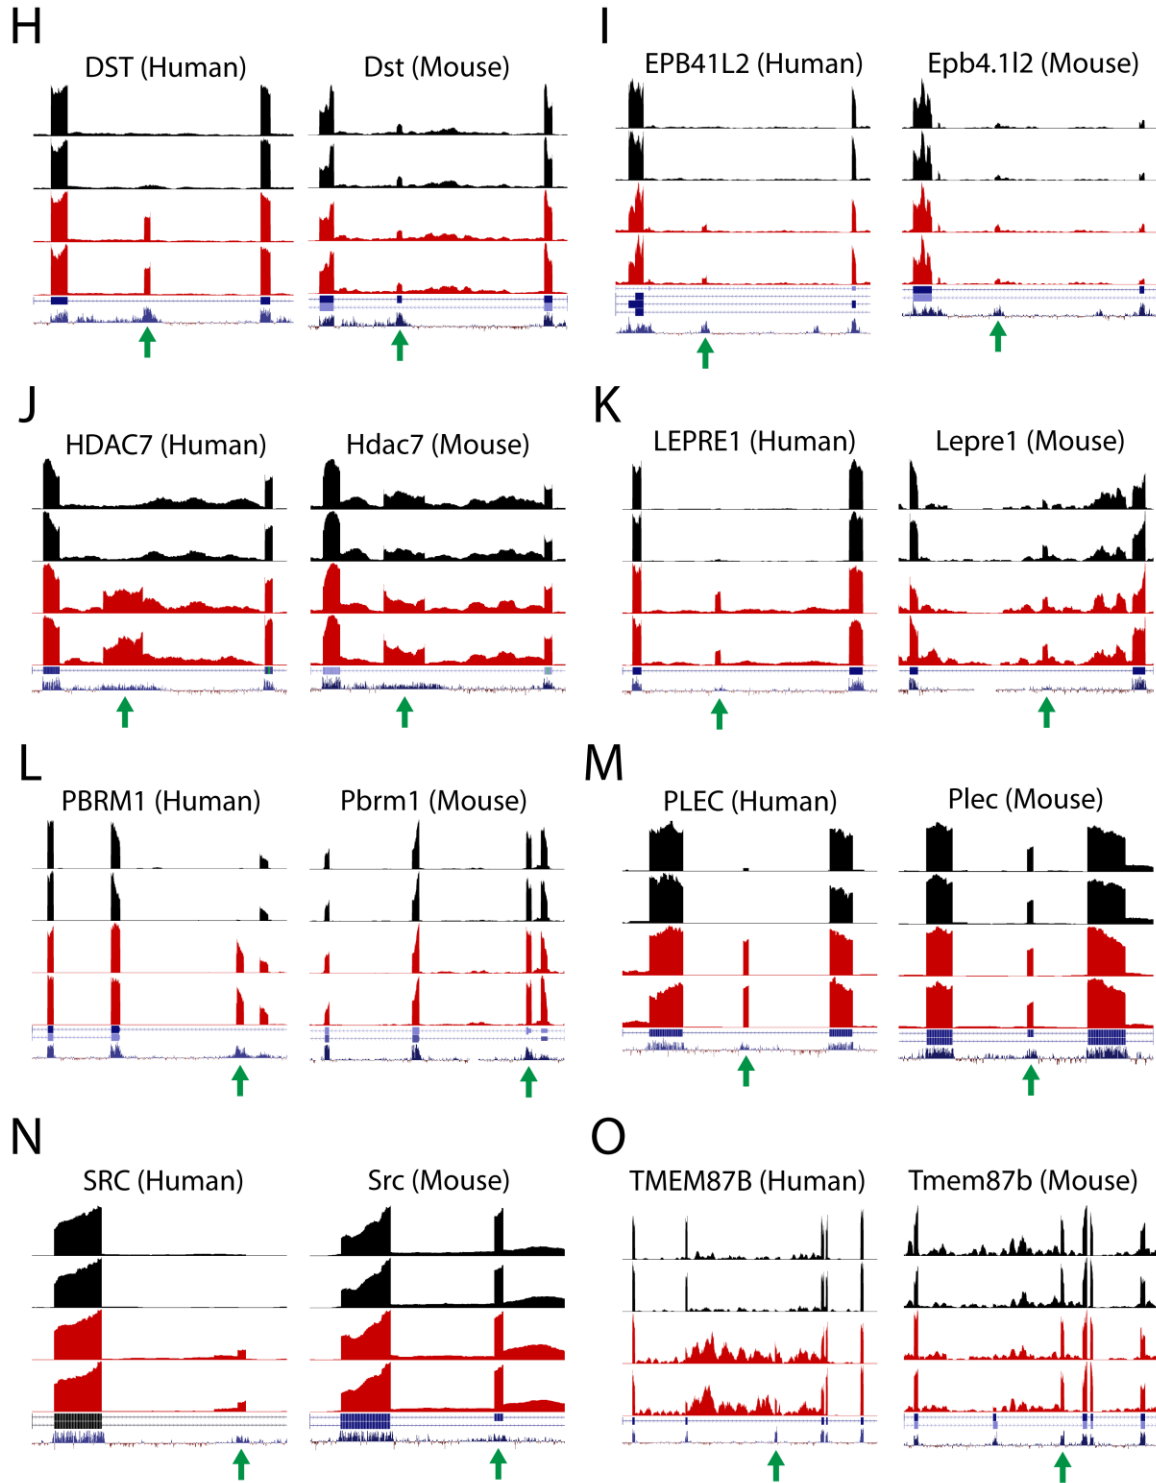

**Supplemental Figure 4, related to Figure 4 | Ptpb2 knockout does not affect some repressed exons that are activated in neurons.**

(A–O) Examples of mouse repressed exons that are activated in neurons where Ptpb2 knockout has no impact on exon splicing.

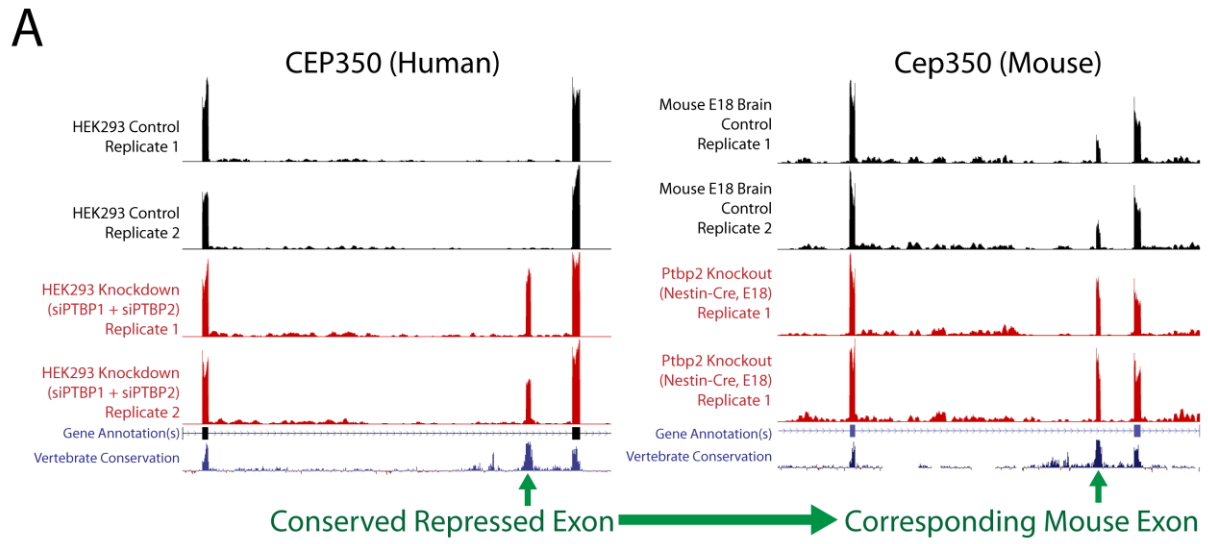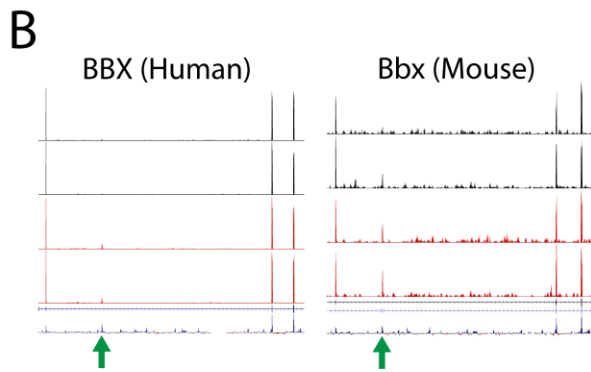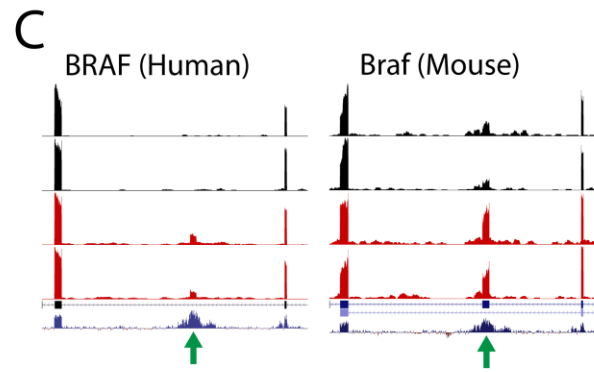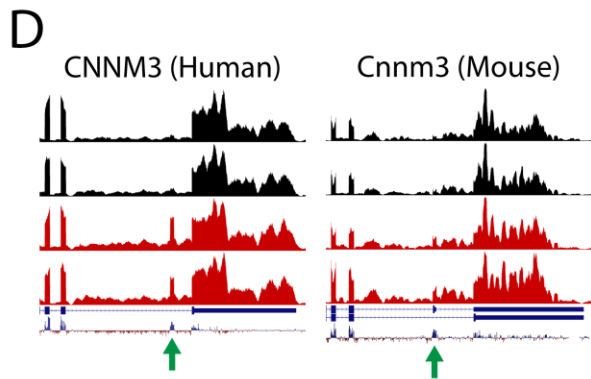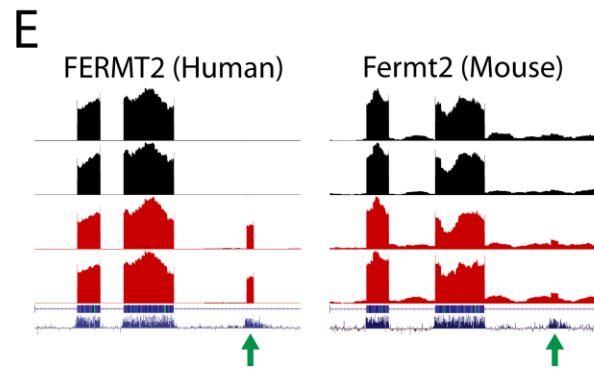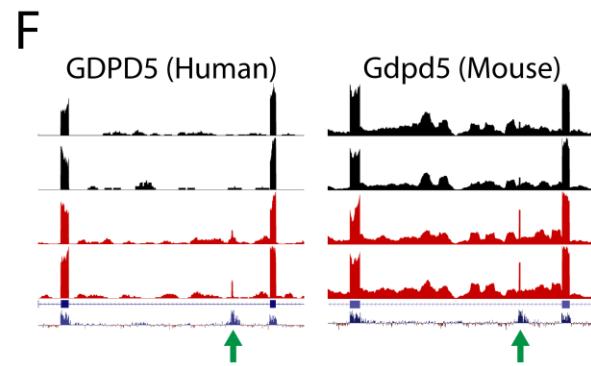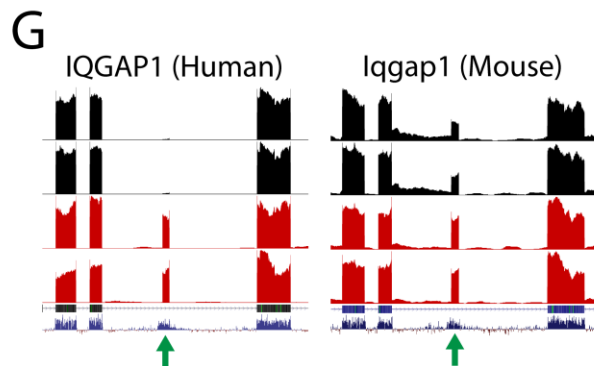

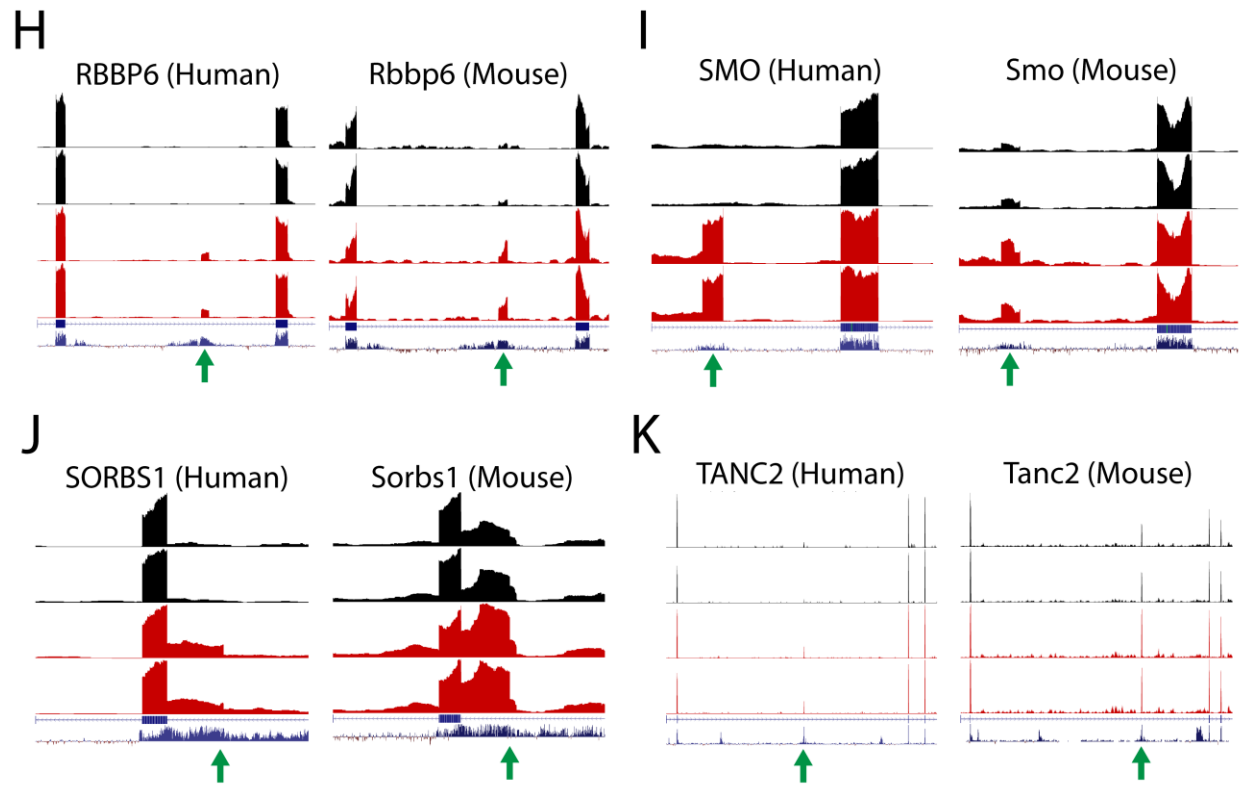

**Supplemental Figure 5, related to Figure 4 | Ptp2 knockout modestly increases splicing of some repressed exons that are activated in neurons.**

(A–K) Example of mouse repressed exons that are activated in neurons where Ptp2 knockout results in a modest increase in exon splicing.

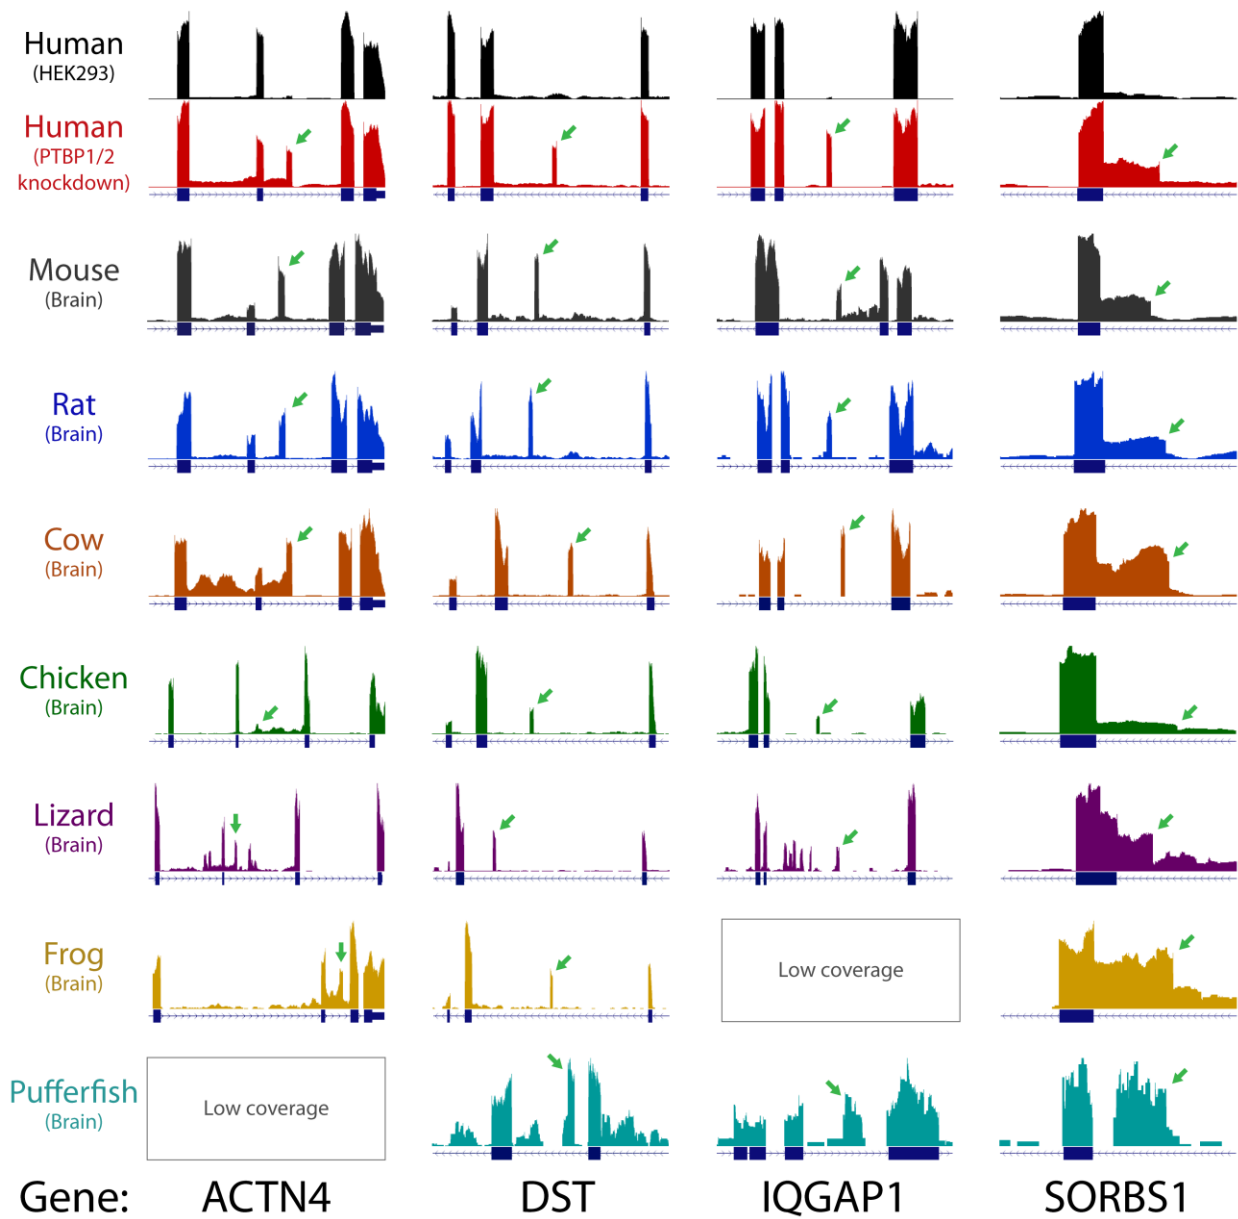



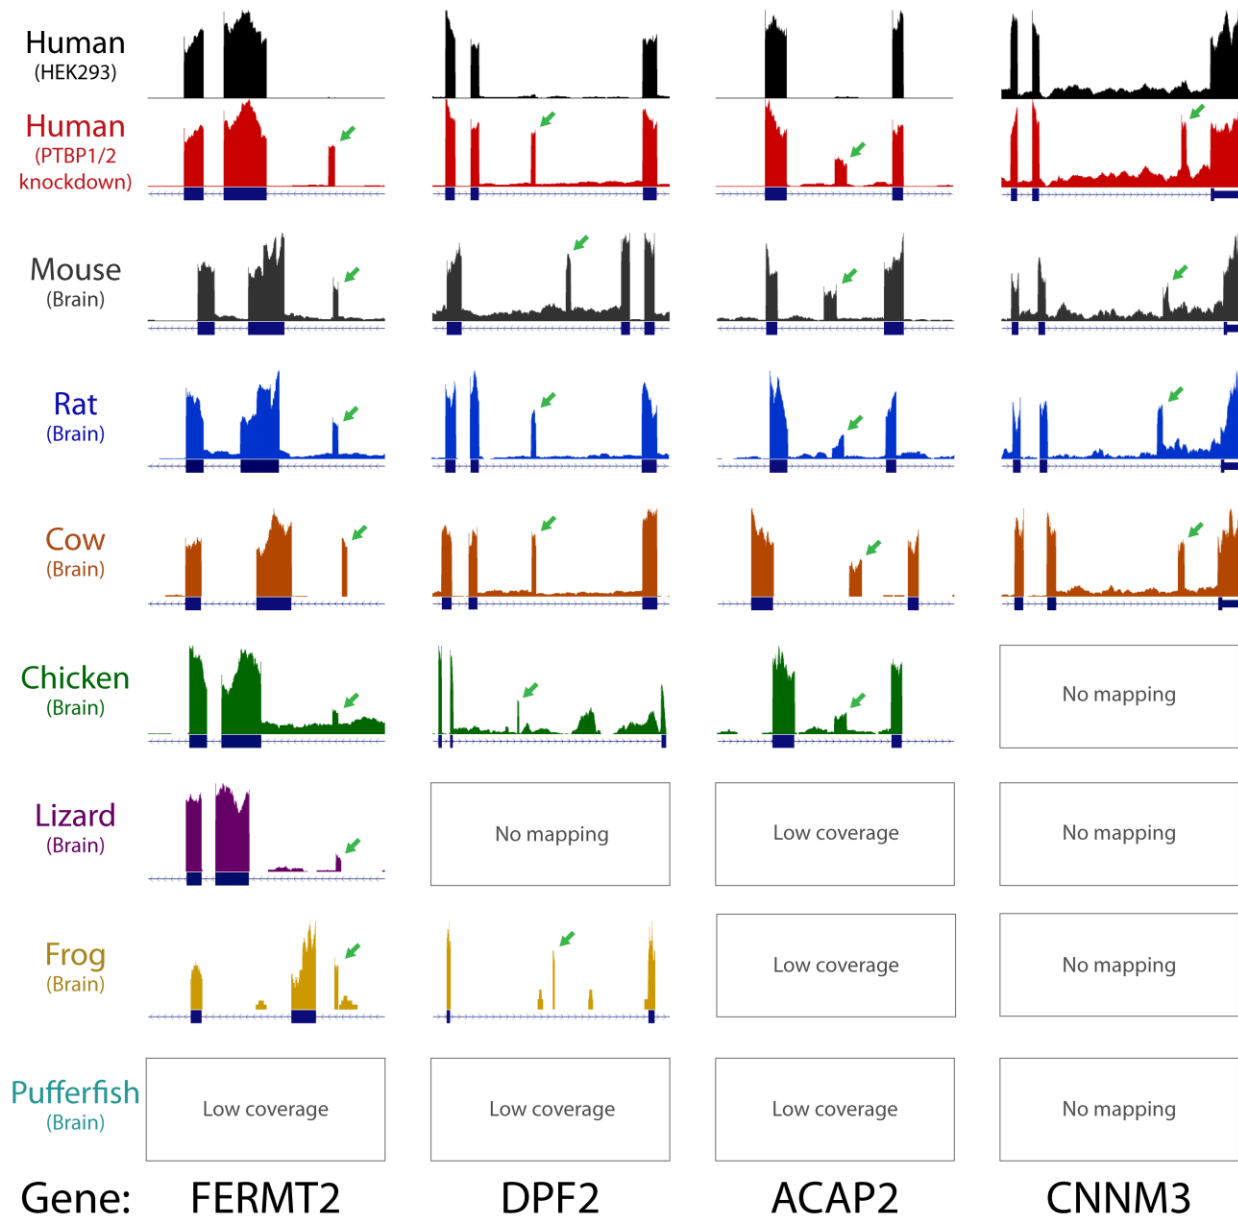

**Supplemental Figure 6, related to Figure 4 | Conserved PTBP1/2 repressed exons are found across vertebrate brains**

Analysis of conserved PTBP1/2 repressed exons and the equivalent genomic regions of other species confirms that these tissue-specific exons (green arrows) are present across many vertebrate brains. ‘Low coverage’ refers to insufficient read alignments in the genomic locus. ‘No mapping’ indicates that no homologous transcript can be identified in the species. The specific genome coordinates used for each species and gene are listed in the Supplemental Excel File.

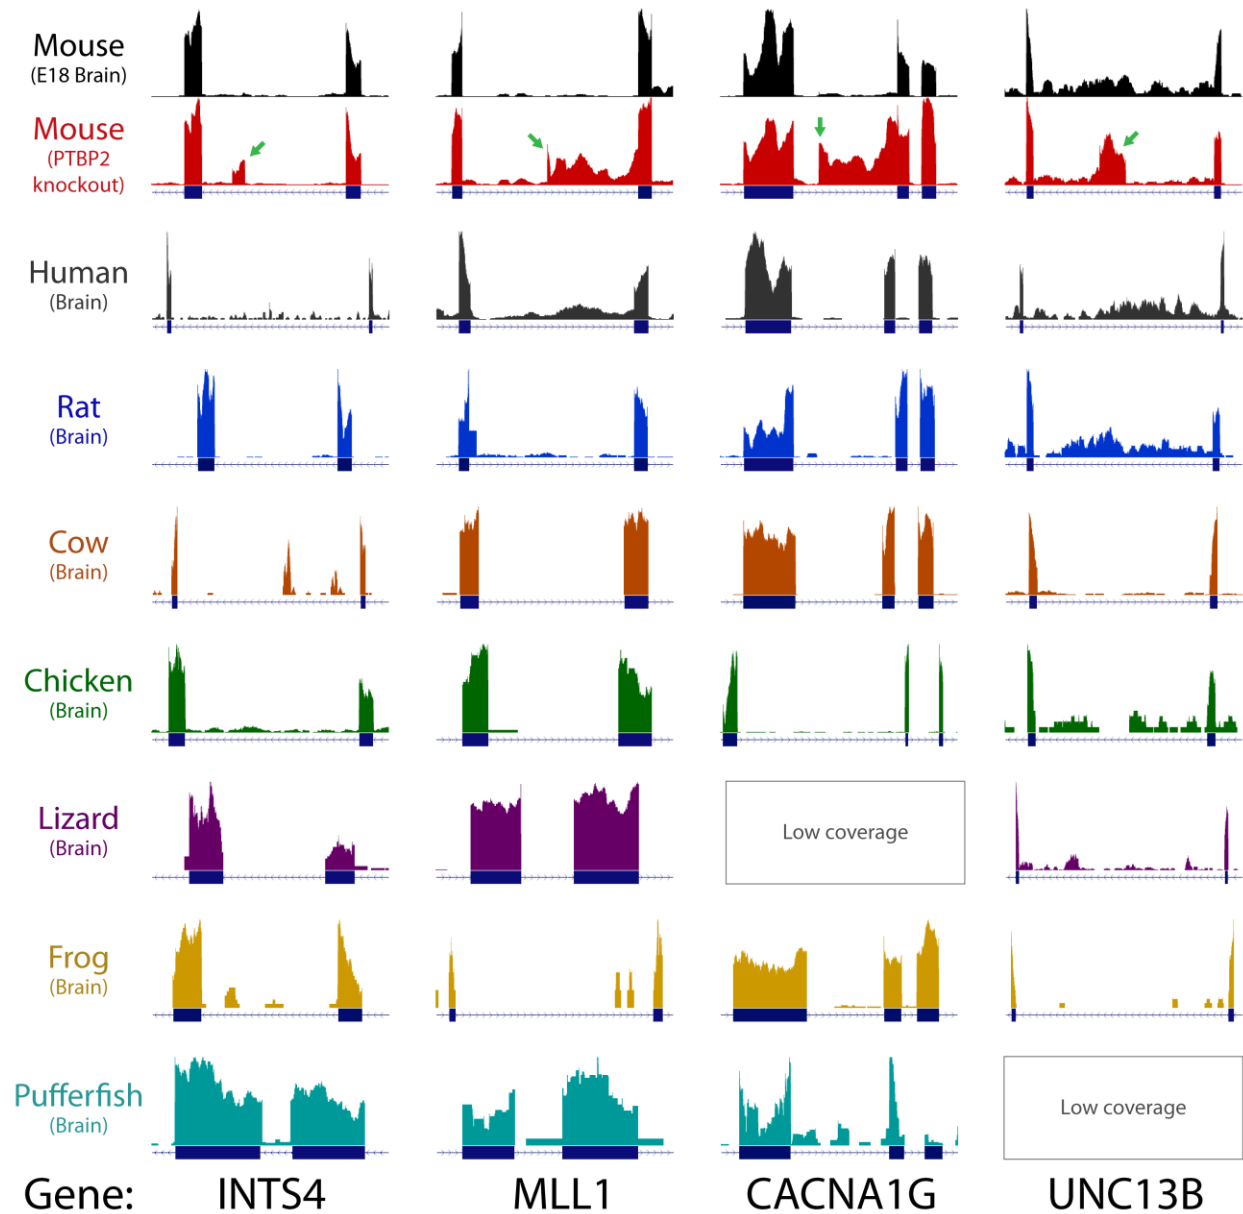

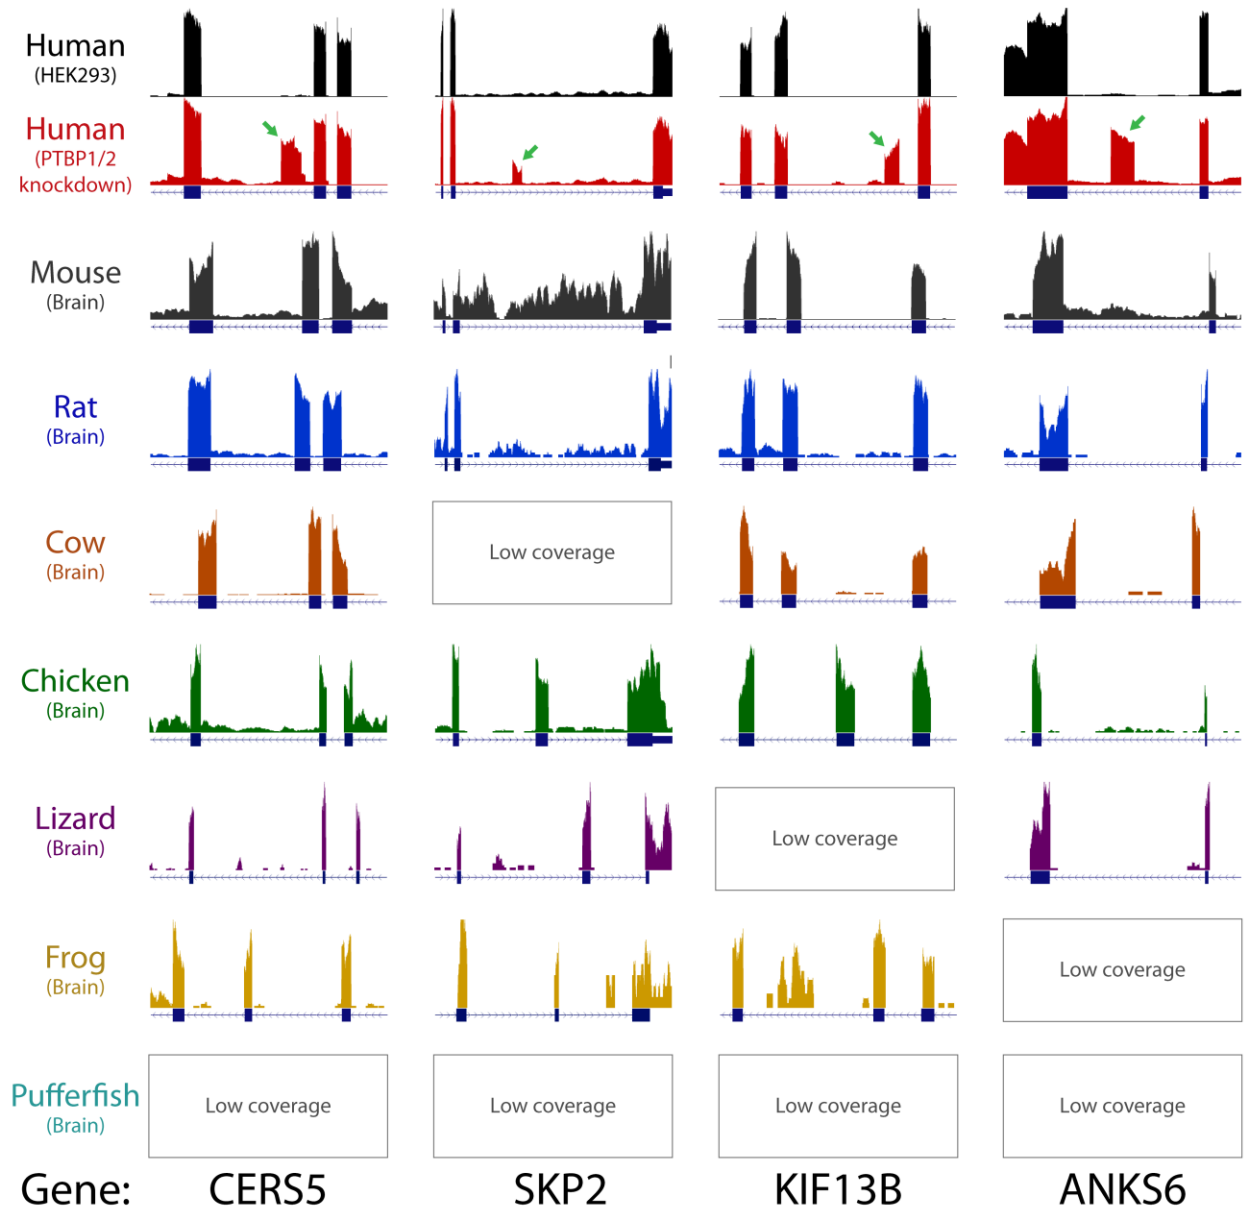

**Supplemental Figure 7, related to Figure 4 | Nonconserved PTBP1/2 cryptic exons are not present in the brains of other vertebrate species**

Analysis of nonconserved PTBP1/2 cryptic exons and equivalent genomic regions of other species confirms that nonconserved cryptic exons (green arrows) are not present in other vertebrate brains. ‘Low coverage’ refers to insufficient read alignments in the genomic locus. ‘No mapping’ indicates that no homologous transcript can be identified in the species. The specific genome coordinates used for each species and gene are listed in the Supplemental Excel File.

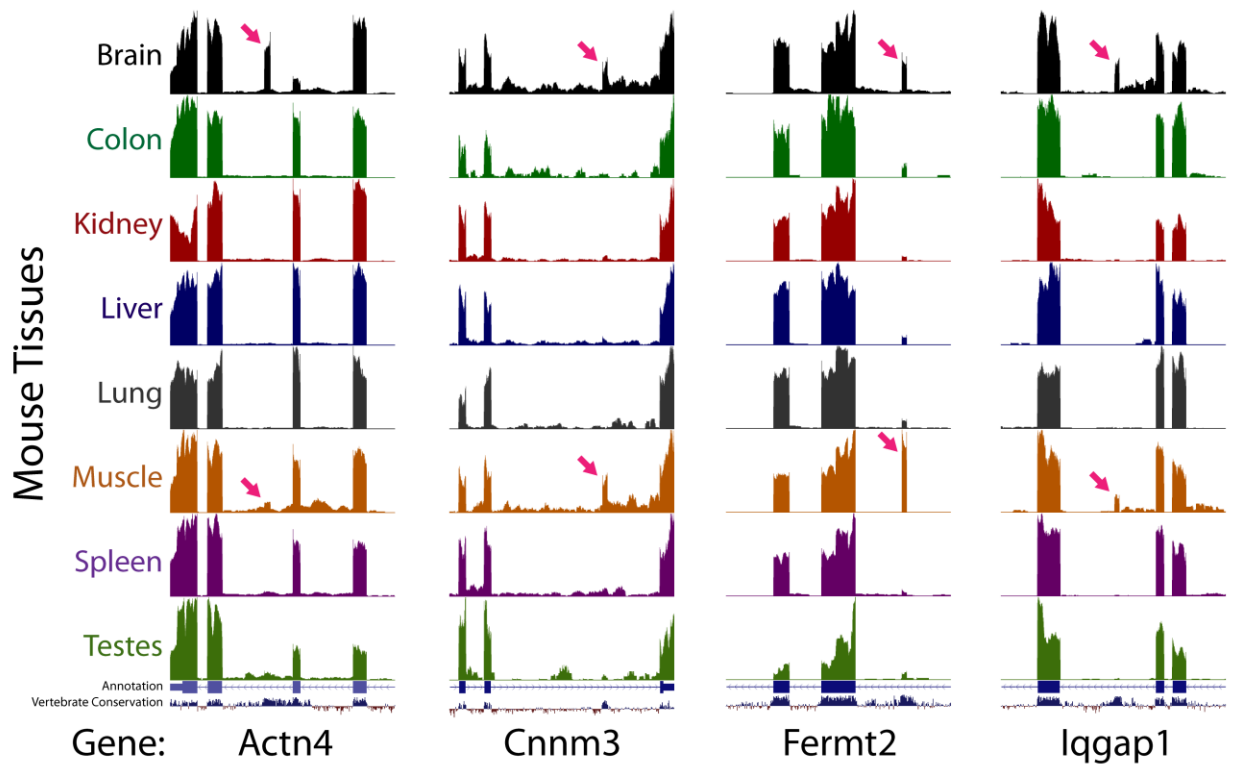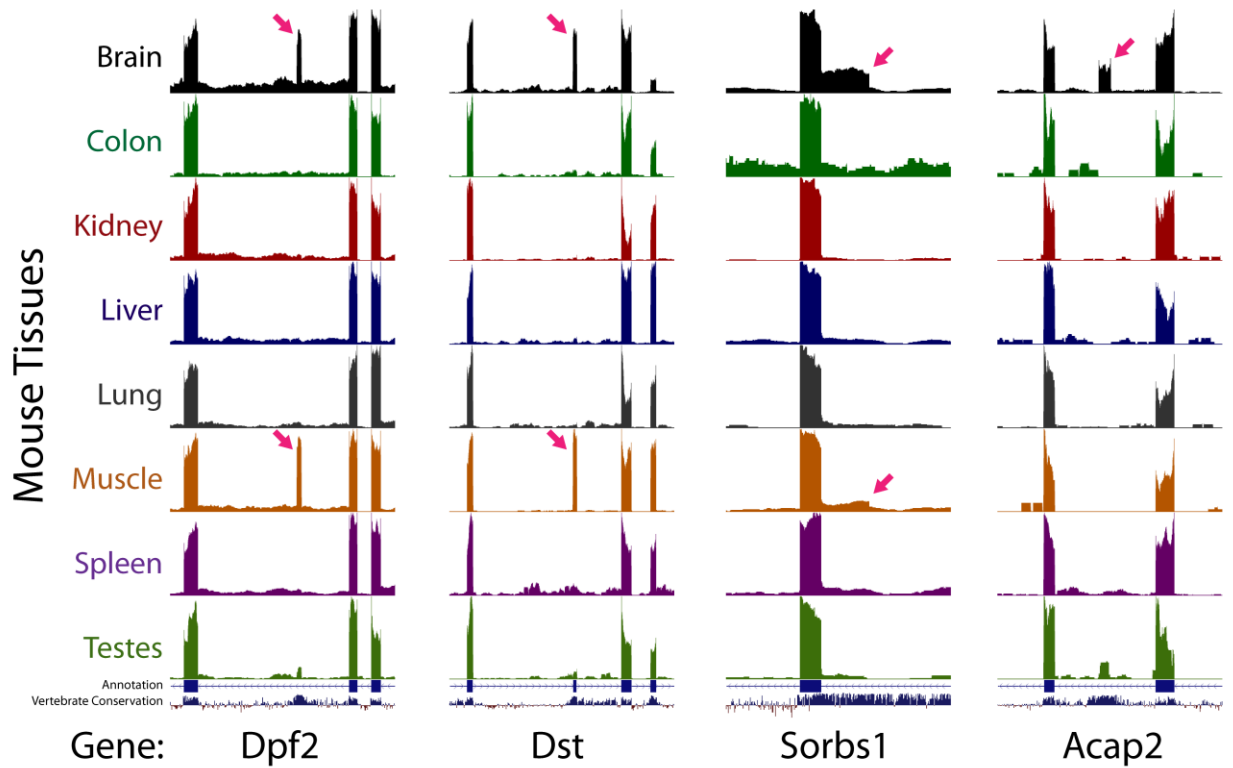

**Supplemental Figure 8, related to Figure 4 | Conserved tissue-specific exons are present in brain and muscle but not in other tissues**

Analysis of RNA-seq data from various mouse tissues reveals that conserved tissue-specific exons that are normally repressed by PTBP1/2 in undifferentiated cells, can instead be found in brain and muscle—tissues that express low levels of PTBP1 (Lilleväli et al., 2001)—but not in other tissues such as colon, kidney, liver, lung, spleen, or testes.

| Gene Symbol | Full Name                                              | Human Cryptic Exon Location (hg19) | Inf. Ins. | 5' UTR or ncRNA | Exon Ext. | NMID | UCSC ID (HEK293) | HEK293 CTRL (FPKM) | HEK293 KD (FPKM) | HEK293 CTRL vs KD (FC) |
|-------------|--------------------------------------------------------|------------------------------------|-----------|-----------------|-----------|------|------------------|--------------------|------------------|------------------------|
| ACAP2       | Centaurin, Beta 2                                      | chr3:195,015,925-195,016,029       | Y         | --              | --        | --   | uc003fun.4       | 5.6                | 6.1              | 1.1                    |
| ACTN4       | Actinin, Alpha 4                                       | chr19:39,218,956-39,219,021        | Y         | --              | --        | --   | uc002oja.2       | 132.3              | 68.2             | -1.9                   |
| ACTN4       | Actinin, Alpha 4                                       | chr19:39,204,349-39,204,426        | Y/N       | --              | --        | --   | uc002oja.2       | 132.3              | 68.2             | -1.9                   |
| ADAM22      | ADAM metalloproteinase domain 22                       | chr7:87,808,358-87,808,444         | Y         | --              | Y         | --   | uc003ujo.3       | 2.3                | 1.2              | -1.9                   |
| AGRN        | AgRin                                                  | chr1:986,412-986,423               | Y         | --              | --        | --   | uc001ack.2       | 26.8               | 21.2             | -1.3                   |
| ARRGFE11    | Rho guanine nucleotide exchange factor (GEF) 11        | chr1:156,957,502-156,957,534       | Y         | --              | --        | --   | uc001fqo.3       | 5.1                | 2.5              | -2.1                   |
| ATG16L1     | Autophagy Related 16-Like 1 (S. Cerevisiae)            | chr2:234,182,637-234,182,687       | Y         | --              | --        | --   | uc002yua.3       | 4.6                | 3.2              | -1.5                   |
| BRAF        | B-Raf Proto-Oncogene, Serine/Threonine Kinase          | chr7:140,485,489-140,485,608       | Y         | --              | --        | --   | uc003wvc.4       | 5.2                | 6.4              | 1.2                    |
| CEP350      | Centrosomal Protein 350kDa                             | chr1:180,042,921-180,043,043       | Y         | --              | --        | --   | uc001gnt.3       | 3.6                | 3.1              | -1.2                   |
| DIP2A       | Disco-Interacting Protein 2 Homolog A                  | chr21:47,979,747-47,979,776        | Y         | --              | --        | --   | uc002zjo.2       | 7.2                | 5.6              | -1.3                   |
| DIP2        | D4, Zinc And Double PHD Fingers Family 2               | chr11:65,112,051-65,112,092        | Y         | --              | --        | --   | uc001odm.3       | 25.5               | 24.6             | -1.0                   |
| DST         | Dystonin                                               | chr6:56,329,483-56,329,554         | Y         | --              | --        | --   | uc003pcy.4       | 11.1               | 12.1             | 1.1                    |
| FERM12      | Fermitin Family Member 2                               | chr14:53,348,514-53,348,546        | Y         | --              | --        | --   | uc001xac.3       | 3.1                | 20.0             | 6.4                    |
| GDPD5       | Glycerophosphodiester Phosphodiesterase 2              | chr11:75,150,385-75,150,399        | Y         | --              | --        | --   | uc001oww.4       | 0.5                | 0.5              | 1.1                    |
| PLEC        | Plectin                                                | chr8:145,012,569-145,012,583       | Y         | --              | --        | --   | uc003zaj.2       | 2.2                | 1.8              | -1.2                   |
| PUM2        | Pumillo-2                                              | chr2:20,524,811-20,524,882         | Y/N       | --              | --        | --   | uc002rdu.1       | 12.2               | 7.4              | -1.7                   |
| RBBP6       | Retinoblastoma Binding Protein 6                       | chr16:24,569,742-24,569,855        | Y         | --              | --        | --   | uc002dmh.3       | 14.6               | 13.0             | -1.1                   |
| SORBS1      | Sorbin And SH3 Domain Containing 1                     | chr10:97,081,779-97,081,910        | Y         | --              | Y         | --   | uc010qoe.2       | 1.5                | 2.1              | 1.4                    |
| SRC         | SRC Proto-Oncogene, Non-Receptor Tyrosine Kinase       | chr20:36,014,863-36,014,880        | Y         | --              | --        | --   | uc002xgy.3       | 13.0               | 9.9              | -1.3                   |
| VIT1A       | Vesicle Transport V-SNARE Protein Vit1-Like 2          | chr10:114,293,289-114,293,309      | Y         | --              | --        | --   | uc001kzz.3       | 5.2                | 4.2              | -1.2                   |
| PBRM1       | Polybromo 1                                            | chr3:52,715,711-52,715,836         | --        | 5'UTR           | --        | --   | uc003dew.2       | 6.3                | 4.7              | -1.3                   |
| PBRM1       | Polybromo 1                                            | chr3:52,715,720-52,715,836         | --        | 5'UTR           | --        | --   | uc003dew.2       | 6.3                | 4.7              | -1.3                   |
| ACTN4       | Actinin, Alpha 4                                       | chr19:39,201,916-39,202,001        | --        | --              | --        | N    | uc002oja.2       | 132.3              | 68.2             | -1.9                   |
| CCDC64      | Coiled-Coil Domain Containing 64                       | chr12:120,528,715-120,528,823      | --        | --              | --        | N    | uc001txl.1       | 1.7                | 2.2              | 1.3                    |
| CNNM3       | Cylin-M3                                               | chr2:97,497,706-97,497,805         | --        | --              | --        | N    | uc002swy.3       | 11.3               | 7.5              | -1.5                   |
| DNAI13      | RME-8                                                  | chr3:132,256,002-132,256,110       | --        | --              | --        | N    | uc003eor.3       | 5.9                | 4.2              | -1.4                   |
| LIMS1       | LIM And Senescent Cell Antigen-Like Domains 1          | chr2:109,297,425-109,297,616       | --        | --              | --        | N    | uc002tel.3       | 12.2               | 7.8              | -1.6                   |
| PICALM      | Phosphatidylinositol Binding Clathrin Assembly Protein | chr11:85,671,718-85,671,820        | --        | --              | --        | N    | uc001pbm.3       | 8.8                | 13.7             | 1.6                    |

**Supplemental Table 1, related to Figure 4 | Neuron-included exons regulated by PTBP1 and PTBP2 are often in-frame insertions.**

Many conserved cryptic exons identified in the human PTBP1 + PTBP2 double knockdown RNA-seq datasets are actively spliced in mouse brain. The examples listed here illustrate the high percentage of exons that are in-frame insertions. Refer to the Supplemental Excel File for a complete list.

| Gene Symbol | Full Name                                       | Human Cryptic Exon Location (hg19) | Inf. Ins. | 5' UTR or ncRNA | Exon Ext. | NMID | UCSC ID (HEK293) | HEK293 CTRL (FPKM) | HEK293 KD (FPKM) | HEK293 CTRL vs KD (FC) |
|-------------|-------------------------------------------------|------------------------------------|-----------|-----------------|-----------|------|------------------|--------------------|------------------|------------------------|
| IQGAP1      | IQ Motif Containing GTPase Activating Protein 1 | chr15:91,025,934-91,025,981        | --        | --              | --        | Y    | uc002bpl.1       | 29.4               | 3.6              | -8.2                   |
| SNAP23      | Synaptosomal-Associated Protein, 23kDa          | chr15:42,813,812-42,813,906        | --        | --              | --        | Y    | uc001zpz.2       | 23.0               | 4.9              | -4.7                   |
| LEPRE1      | Prolyl 3-Hydroxylase 1                          | chr1:43,222,072-43,222,126         | --        | --              | --        | Y    | uc001chv.2       | 17.1               | 6.3              | -2.7                   |
| SMO         | Smoothened, Frizzled Class Receptor             | chr7:128,842,464-128,842,577       | --        | --              | --        | Y    | uc003vor.3       | 19.0               | 8.2              | -2.3                   |
| FLNB        | Filamin B, Beta                                 | chr3:58,085,365-58,085,462         | --        | --              | --        | Y    | uc010hnt.2       | 11.3               | 5.1              | -2.2                   |
| HDAC7       | Histone Deacetylase 7                           | chr12:48,183,989-48,184,246        | --        | --              | --        | Y    | uc001rqi.4       | 5.0                | 3.2              | -1.6                   |
| FMNL3       | Formin-Like 3                                   | chr12:50,052,034-50,052,118        | --        | --              | --        | Y    | uc001rvu.1       | 1.4                | 1.2              | -1.2                   |

**Supplemental Table 2, related to Figure 4 | Certain neuron-included exons regulated by PTBP1 and PTBP2 appear to undergo NMD.**

Many conserved cryptic exons identified in the human PTBP1 + PTBP2 double knockdown RNA-seq datasets are actively spliced in mouse brain. The exons identified here are predicted to undergo NMD. Refer to the Supplemental Excel File for a complete list.

## **Supplemental Excel File**

Sheet 1. Human PTBP1/2 repressed exons (conserved and nonconserved)

Sheet 2. Mouse Ptbp1/2 repressed exons (conserved and nonconserved)

Sheet 3. List of human PTBP1/2 repressed exons that are actively spliced in mouse neurons

Sheet 4. Metadata for Supplemental Figures 6-8
